# Supplementary material for: Decadal Application of WRF/Chem under Future Climate and Emission Scenarios: Impacts of Technology-Driven Climate and Emission Changes on Regional Meteorology and Air Quality
Source: MDPI journal article supplement (doi:10.3390/atmos14020225), 2023-01-21
Supplement: s1 [file s1]

Archive with 1 entries (1 files):
- atmosphere-2120591-supplementary.pdf
