# Supplementary material for: Decadal Application of WRF/Chem under Future Climate and Emission Scenarios: Impacts of Technology-Driven Climate and Emission Changes on Regional Meteorology and Air Quality
Source: MDPI journal article supplement (doi:10.3390/atmos14020225), 2023-01-21
Supplement: s1 [file s1 › atmosphere-2120591-supplementary.pdf]

# **Decadal application of WRF/Chem under future climate and emission scenarios: Impacts of technology-driven climate and emission changes on regional meteorology and air quality**

**Chinmay Jena <sup>1,2</sup>, Yang Zhang <sup>1,3,\*</sup>, Kai Wang <sup>1,3,4</sup> and Patrick C. Campbell <sup>1,5,6</sup>**

<sup>1</sup> Department of Marine, Earth, and Atmospheric Sciences, North Carolina State University, Raleigh, NC 27695, USA

<sup>2</sup> India Meteorological Department, Ministry of Earth Science, Lodhi Road, New Delhi, India, 110003.

<sup>3</sup> Department of Civil and Environmental Engineering, Northeastern University, Boston, MA 02115, USA

<sup>4</sup> Lynker, Environmental Modeling Center, NOAA, College Park, MD 20740, USA

<sup>5</sup> Cooperative Institute for Satellite Earth System Studies, Center for Spatial Information Science and Systems, George Mason University, Fairfax, VA 22030, USA.

<sup>6</sup> Atmospheric Sciences Modeling Division, Air Resources Laboratory, NOAA, College Park, MD 20740, USA

\* Correspondence: ya.zhang@northeastern.edu

### TDM/A1B

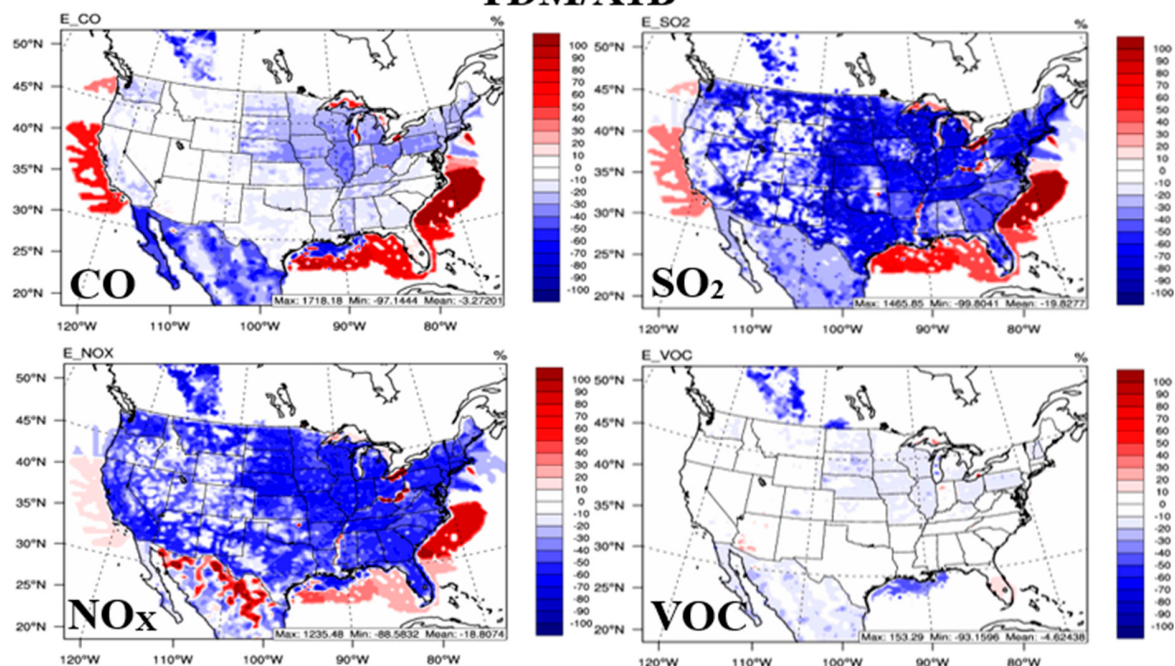

### TDM/B2

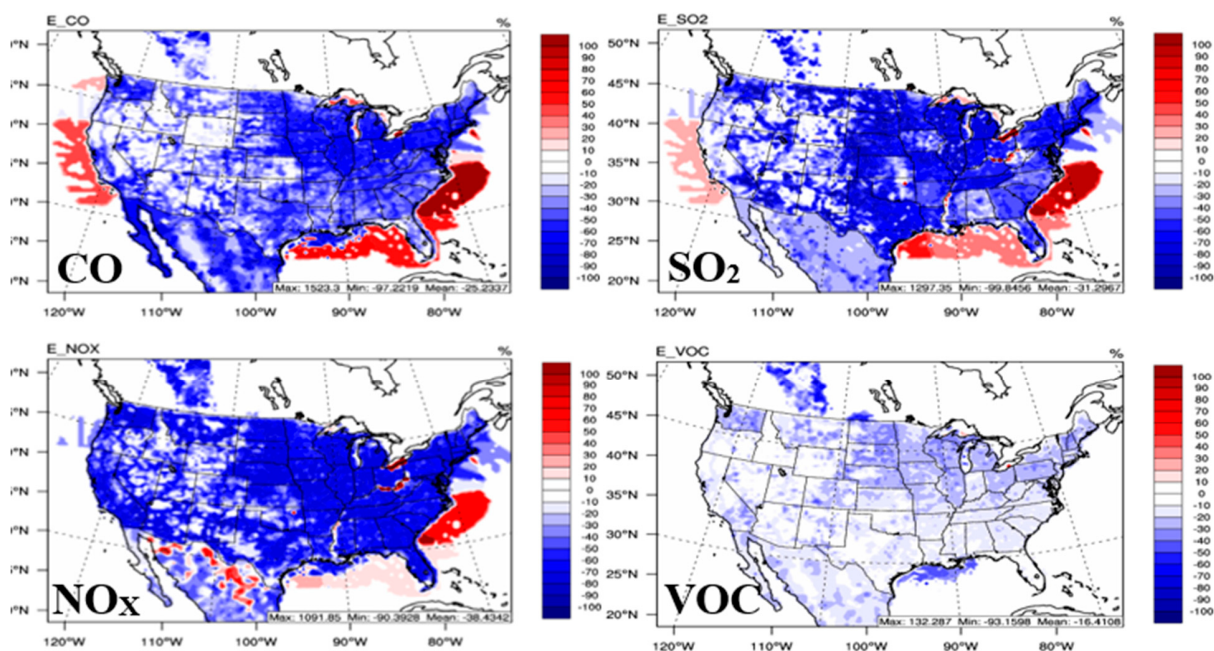

**Figure S1.** Spatial distributions of relative (%) changes of CO, SO<sub>2</sub>, NO<sub>x</sub>, and VOC emissions between annual average of future (2046 - 2055) and present (2005) conditions under the TDM/A1B (top) and TDM/B2 (bottom) scenarios.

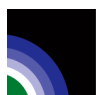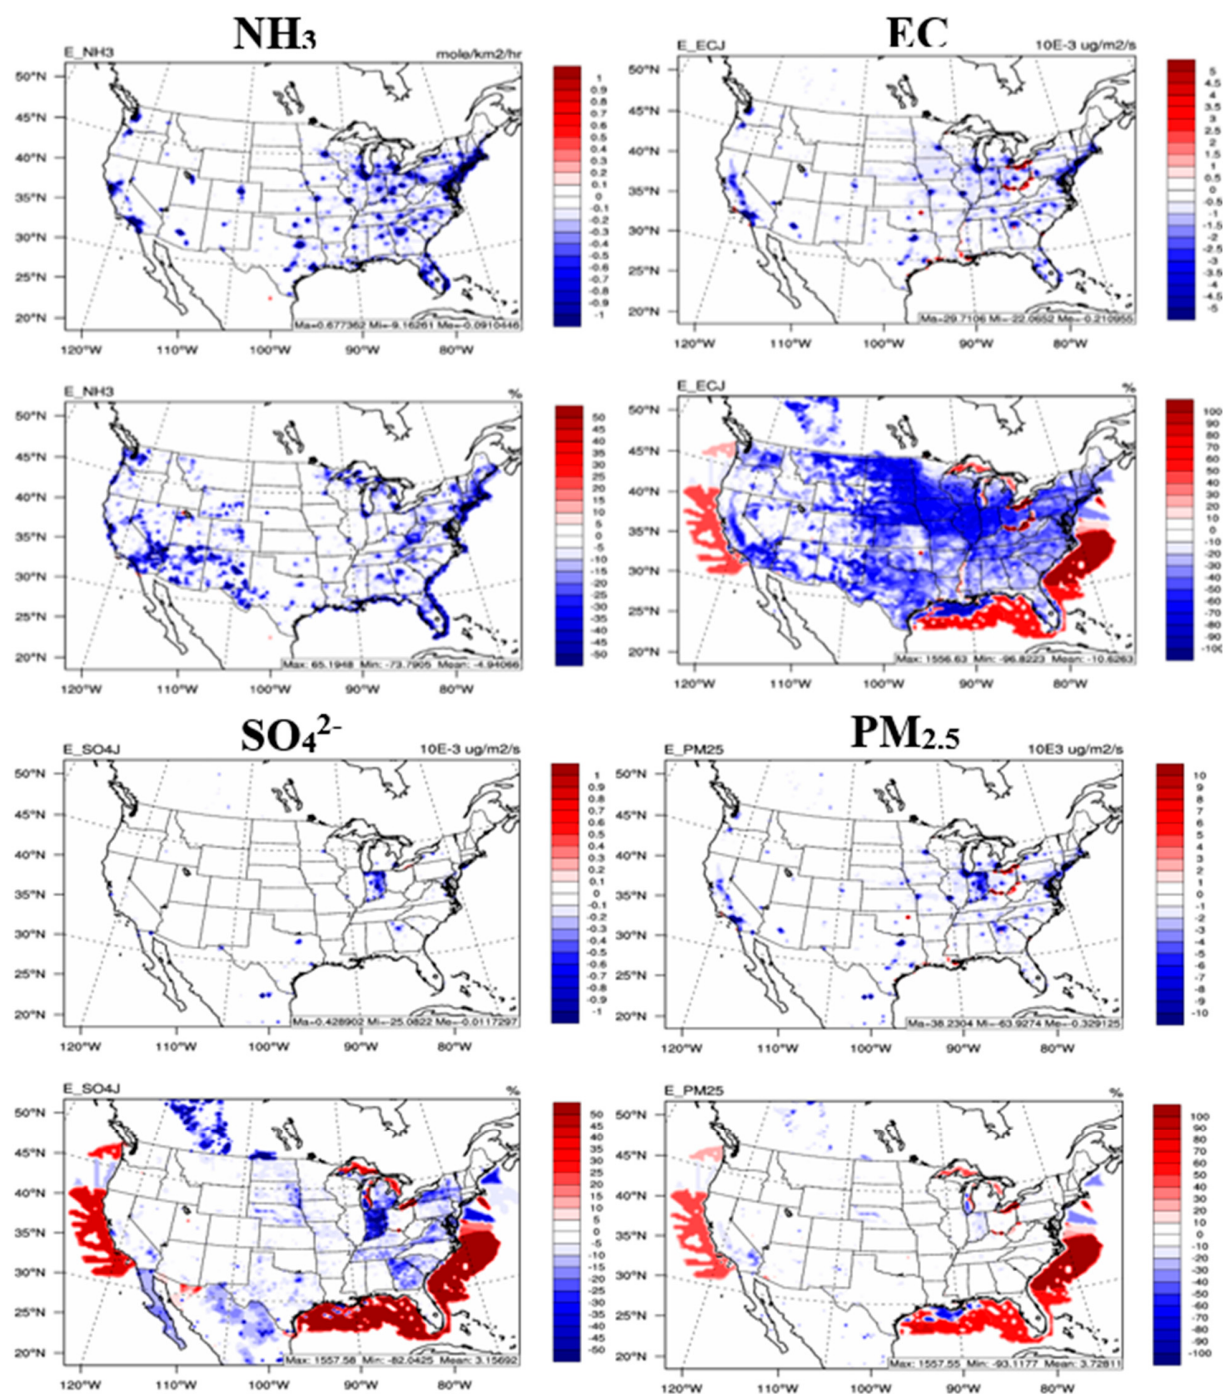

**Figure S2.** Spatial distributions of absolute (top panel) relative (lower panel) changes of  $\text{NH}_3$ , EC,  $\text{SO}_4^{2-}$ , and  $\text{PM}_{2.5}$  emissions between annual average of future (2046 - 2055) and present (2005) conditions under the TDM/A1B scenario.

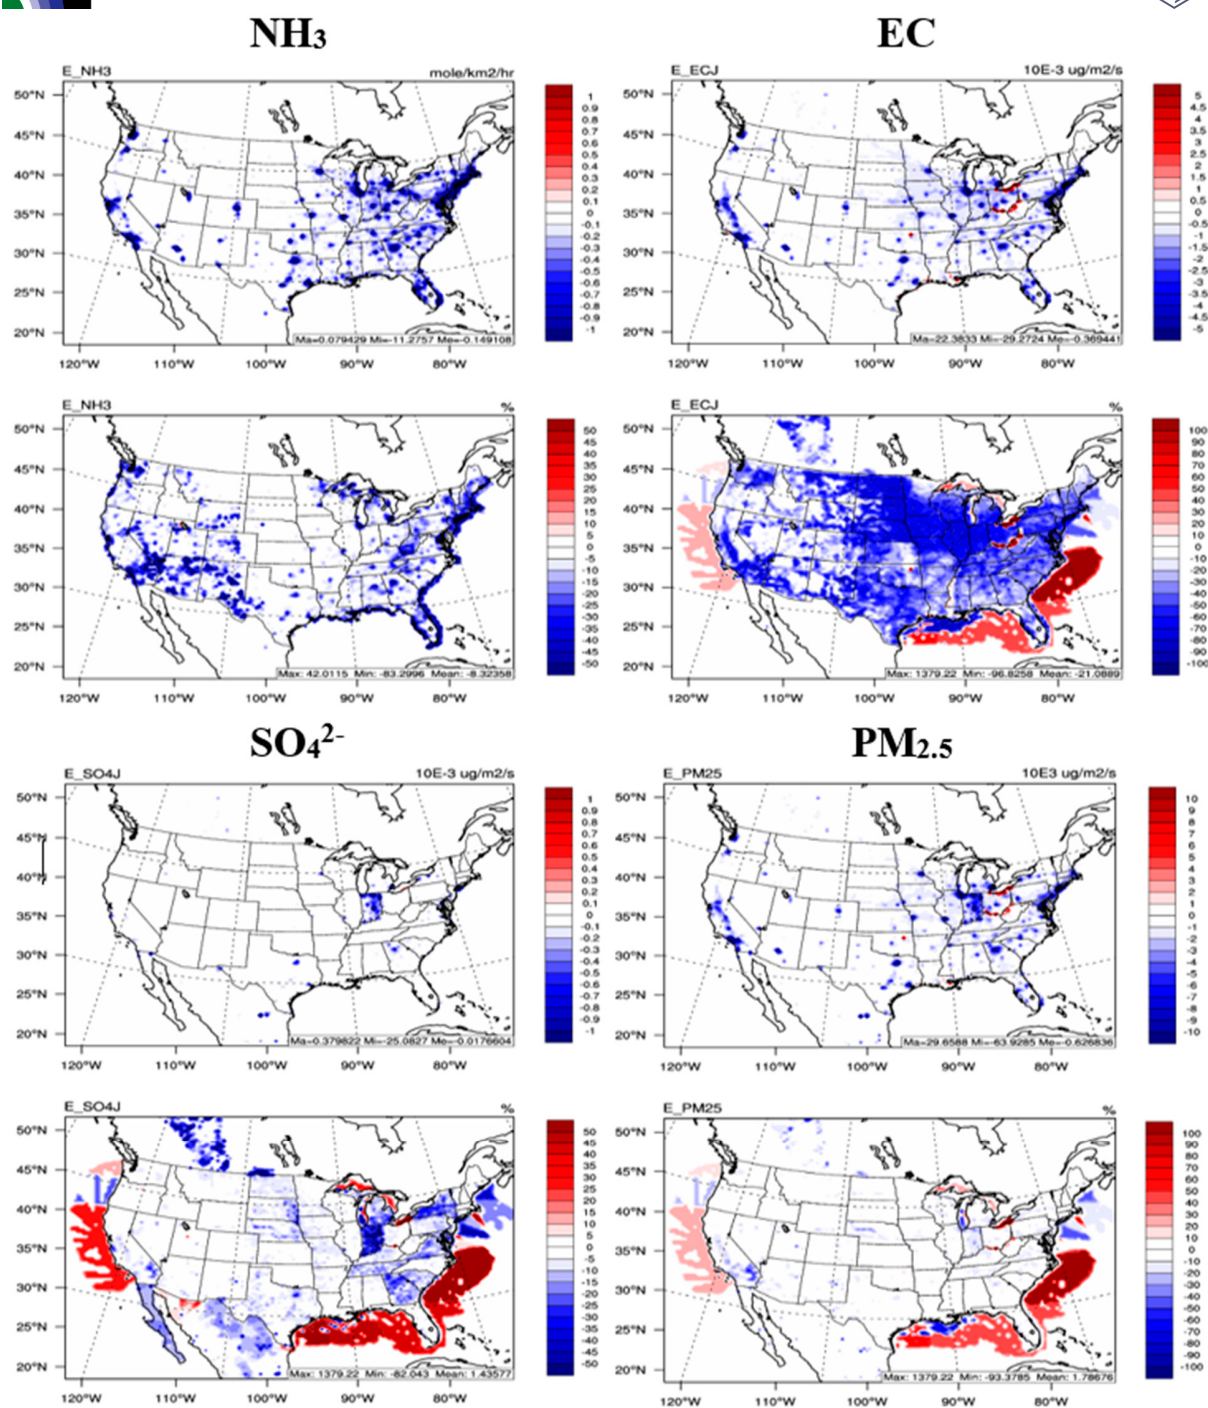

Figure S3. Same as in Figure S2, but for the TDM/B2 scenario.

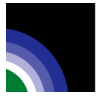

TDM/A1B

Q2

TDM/B2

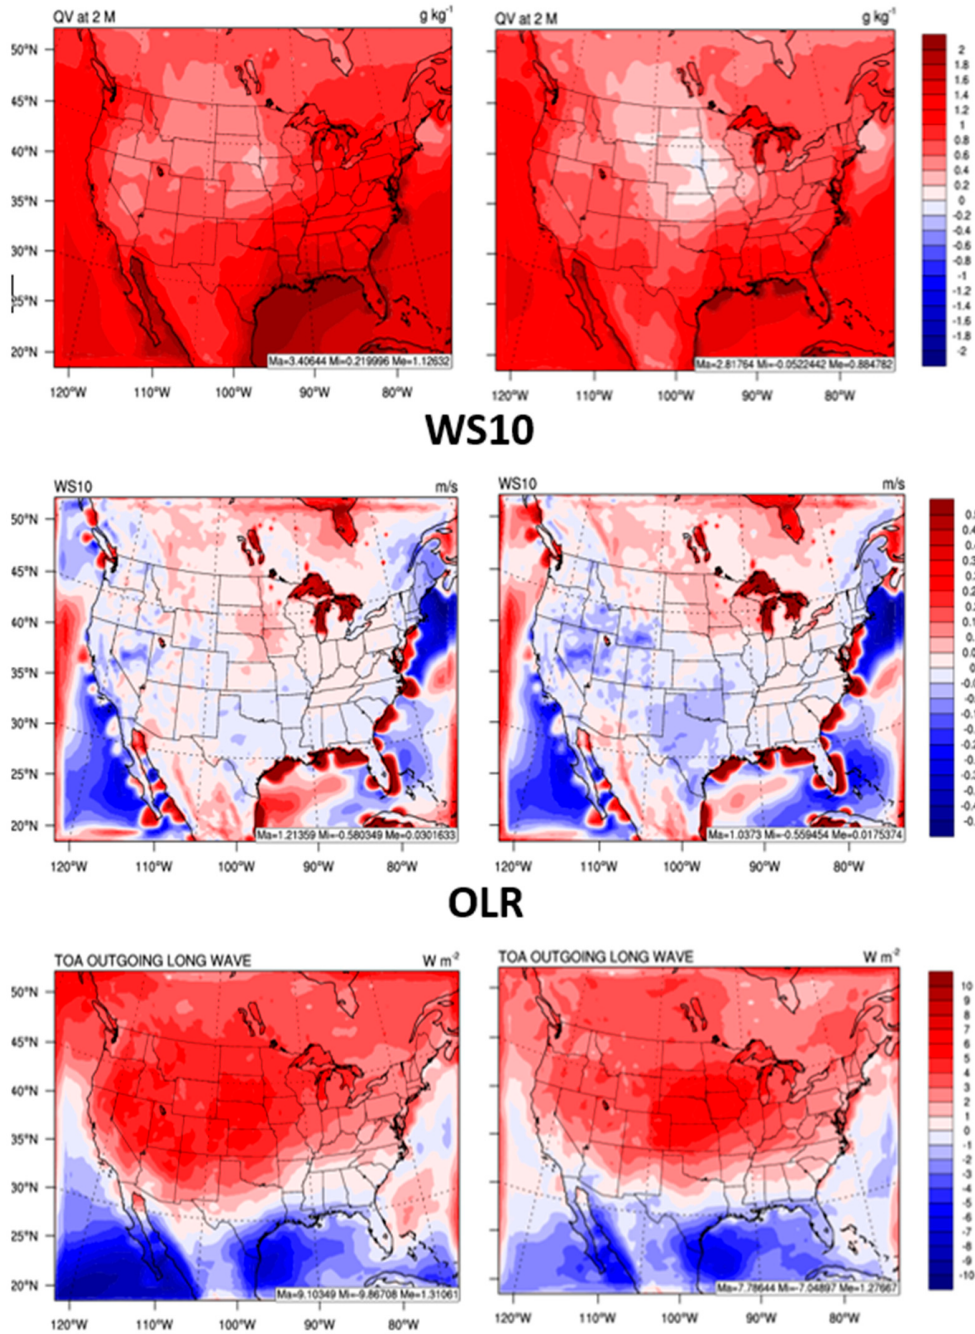

**Figure S4.** Absolute changes of annual average 2-meter water vapor mixing ratio (Q2), 10-meter wind speed (WS10), and outgoing longwave radiation at the top of the atmosphere (OLR) between future and current decade for TDM/A1B (left) and TDM/B2 (right).



# TDM/A1B

# TDM/B2

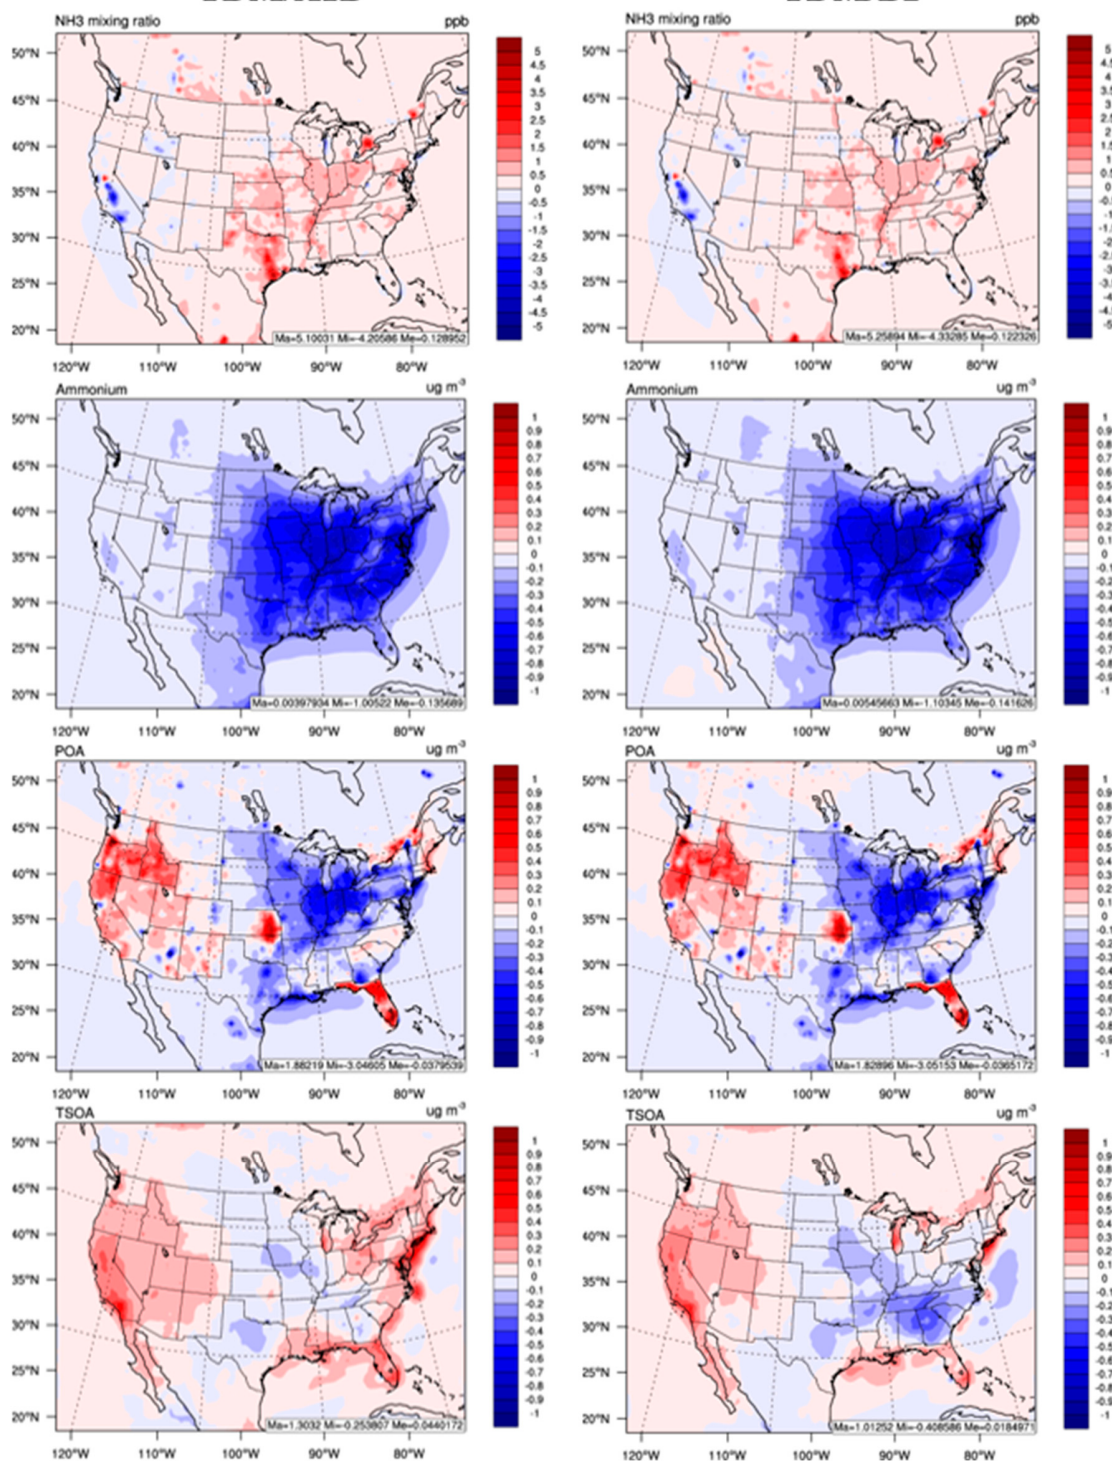

**Figure S5.** Absolute changes of annual average of gaseous ammonia ( $\text{NH}_3$ ), ammonium ( $\text{NH}_4^+$ ), primary organic aerosol (POA), and total secondary organic aerosol (TSOA) between future and current decade for TDM/A1B and TDM/B2.
